# Supplementary material for: Exploiting the Transcriptome of Euphrates Poplar, Populus euphratica (Salicaceae) to Develop and Characterize New EST-SSR Markers and Construct an EST-SSR Database
Source: PLoS One. 2013 Apr 11;8(4):e61337. doi: 10.1371/journal.pone.0061337 (PMC3623821; doi:10.1371/journal.pone.0061337)
Supplement: Table S2 — Frequency of different motif types. (XLS) [file pone.0061337.s005.xls]

## Sheet: Sheet1
motif type	number of SSR	ratio	ratio%
AG/CT	596	0.141837	14.1837
AAG/CTT	416	0.0990005	9.90005
AGG/CCT	279	0.066397	6.6397
AGC/CTG	212	0.0504522	5.04522
ACC/GGT	208	0.0495002	4.95002
ATC/ATG	141	0.0335554	3.35554
AAT/ATT	135	0.0321276	3.21276
AC/GT	108	0.025702	2.5702
AAC/GTT	104	0.0247501	2.47501
AAAAAG/CTTTTT	89	0.0211804	2.11804
AT/AT	81	0.0192765	1.92765
AAAAAT/ATTTTT	74	0.0176107	1.76107
AAAAG/CTTTT	65	0.0154688	1.54688
ACCTCC/AGGTGG	59	0.0140409	1.40409
AGAGGG/CCCTCT	57	0.013565	1.3565
AAAG/CTTT	56	0.013327	1.3327
ACG/CGT	51	0.0121371	1.21371
AACAGC/CTGTTG	49	0.0116611	1.16611
AAAT/ATTT	33	0.0078534	0.78534
AAGAGG/CCTCTT	29	0.00690148	0.690148
AAAAT/ATTTT	28	0.00666349	0.666349
AAAAAC/GTTTTT	26	0.00618753	0.618753
AAGGAG/CCTTCT	26	0.00618753	0.618753
ACCGCC/CGGTGG	26	0.00618753	0.618753
AGAGG/CCTCT	25	0.00594955	0.594955
ACCATC/ATGGTG	25	0.00594955	0.594955
CCG/CGG	24	0.00571157	0.571157
ACCAGC/CTGGTG	23	0.00547358	0.547358
AAGATG/ATCTTC	22	0.0052356	0.52356
AGGG/CCCT	21	0.00499762	0.499762
AAGCAG/CTGCTT	20	0.00475964	0.475964
ACGATG/ATCGTC	20	0.00475964	0.475964
AGGATG/ATCCTC	20	0.00475964	0.475964
AAGAG/CTCTT	19	0.00452166	0.452166
AAAAGG/CCTTTT	18	0.00428367	0.428367
AGATGG/ATCTCC	16	0.00380771	0.380771
AGCAGG/CCTGCT	16	0.00380771	0.380771
AAAGAG/CTCTTT	15	0.00356973	0.356973
AACCAC/GGTTGT	15	0.00356973	0.356973
AAGACG/CGTCTT	15	0.00356973	0.356973
AGGGGG/CCCCCT	15	0.00356973	0.356973
AACCCT/AGGGTT	14	0.00333175	0.333175
AAACAG/CTGTTT	13	0.00309376	0.309376
AAACCC/GGGTTT	13	0.00309376	0.309376
AAGGGG/CCCCTT	13	0.00309376	0.309376
AGAGGC/CCTCTG	13	0.00309376	0.309376
AGAT/ATCT	11	0.0026178	0.26178
AACCAG/CTGGTT	11	0.0026178	0.26178
AAGAGC/CTCTTG	11	0.0026178	0.26178
ACAGAG/CTCTGT	11	0.0026178	0.26178
AACAAG/CTTGTT	10	0.00237982	0.237982
AACACC/GGTGTT	10	0.00237982	0.237982
ACCCCC/GGGGGT	10	0.00237982	0.237982
ACAT/ATGT	9	0.00214184	0.214184
AATTC/AATTG	9	0.00214184	0.214184
AAACAC/GTGTTT	9	0.00214184	0.214184
AAGGGC/CCCTTG	9	0.00214184	0.214184
AGGCGG/CCGCCT	9	0.00214184	0.214184
AAAC/GTTT	8	0.00190386	0.190386
AAAAC/GTTTT	8	0.00190386	0.190386
AAGGG/CCCTT	8	0.00190386	0.190386
AAAACC/GGTTTT	8	0.00190386	0.190386
AAACTG/AGTTTC	8	0.00190386	0.190386
AACATC/ATGTTG	8	0.00190386	0.190386
AAGTGG/ACTTCC	8	0.00190386	0.190386
ACAGCC/CTGTGG	8	0.00190386	0.190386
ACTGCT/AGCAGT	8	0.00190386	0.190386
AGAGAT/ATCTCT	8	0.00190386	0.190386
AGAGCG/CGCTCT	8	0.00190386	0.190386
AGCGGC/CCGCTG	8	0.00190386	0.190386
AGCTCC/AGCTGG	8	0.00190386	0.190386
AGGGGC/CCCCTG	8	0.00190386	0.190386
AAGG/CCTT	7	0.00166587	0.166587
AAAATC/ATTTTG	7	0.00166587	0.166587
AAATCC/ATTTGG	7	0.00166587	0.166587
AAATGG/ATTTCC	7	0.00166587	0.166587
ACTGCC/AGTGGC	7	0.00166587	0.166587
AGATGC/ATCTGC	7	0.00166587	0.166587
AGCATC/ATGCTG	7	0.00166587	0.166587
AGCCGG/CCGGCT	7	0.00166587	0.166587
ACAG/CTGT	6	0.00142789	0.142789
AGATC/ATCTG	6	0.00142789	0.142789
AAAAGC/CTTTTG	6	0.00142789	0.142789
AAAATT/AATTTT	6	0.00142789	0.142789
AACCCC/GGGGTT	6	0.00142789	0.142789
AACCGC/CGGTTG	6	0.00142789	0.142789
AATCAG/ATTCTG	6	0.00142789	0.142789
AATGGC/ATTGCC	6	0.00142789	0.142789
ACAGGG/CCCTGT	6	0.00142789	0.142789
ACCACT/AGTGGT	6	0.00142789	0.142789
AGCCTC/AGGCTG	6	0.00142789	0.142789
AGCTGC/AGCTGC	6	0.00142789	0.142789
ATGGCC/ATGGCC	6	0.00142789	0.142789
AATC/ATTG	5	0.00118991	0.118991
ATCC/ATGG	5	0.00118991	0.118991
AAAGC/CTTTG	5	0.00118991	0.118991
AAAGG/CCTTT	5	0.00118991	0.118991
AAATC/ATTTG	5	0.00118991	0.118991
AACAC/GTGTT	5	0.00118991	0.118991
ACACC/GGTGT	5	0.00118991	0.118991
ACCTC/AGGTG	5	0.00118991	0.118991
AAAGGG/CCCTTT	5	0.00118991	0.118991
AACTTC/AAGTTG	5	0.00118991	0.118991
AAGCTG/AGCTTC	5	0.00118991	0.118991
AAGGTG/ACCTTC	5	0.00118991	0.118991
ACACGC/CGTGTG	5	0.00118991	0.118991
ACCATG/ATGGTC	5	0.00118991	0.118991
ACCCTC/AGGGTG	5	0.00118991	0.118991
ACGGAG/CCGTCT	5	0.00118991	0.118991
AGCCAT/ATGGCT	5	0.00118991	0.118991
AGCCCC/CTGGGG	5	0.00118991	0.118991
ATCCCC/ATGGGG	5	0.00118991	0.118991
ATCCCG/ATCGGG	5	0.00118991	0.118991
CCCCCG/CGGGGG	5	0.00118991	0.118991
AATG/ATTC	4	0.000951928	0.0951928
AGCT/AGCT	4	0.000951928	0.0951928
ACAGC/CTGTG	4	0.000951928	0.0951928
ACATC/ATGTG	4	0.000951928	0.0951928
AGAGC/CTCTG	4	0.000951928	0.0951928
AAAACT/AGTTTT	4	0.000951928	0.0951928
AAAATG/ATTTTC	4	0.000951928	0.0951928
AACGCC/CGTTGG	4	0.000951928	0.0951928
AAGCCG/CGGCTT	4	0.000951928	0.0951928
AAGCGG/CCGCTT	4	0.000951928	0.0951928
AATCAC/ATTGTG	4	0.000951928	0.0951928
AATGAT/ATCATT	4	0.000951928	0.0951928
AATGGT/ACCATT	4	0.000951928	0.0951928
AATTCC/AATTGG	4	0.000951928	0.0951928
ACAGCT/AGCTGT	4	0.000951928	0.0951928
ACAGGC/CCTGTG	4	0.000951928	0.0951928
ACATAT/ATATGT	4	0.000951928	0.0951928
ACCGCT/AGCGGT	4	0.000951928	0.0951928
ACCGGC/CCGGTG	4	0.000951928	0.0951928
ACCGTC/ACGGTG	4	0.000951928	0.0951928
ACGAGG/CCTCGT	4	0.000951928	0.0951928
ACTGCG/AGTCGC	4	0.000951928	0.0951928
AGAGCC/CTCTGG	4	0.000951928	0.0951928
ATCATG/ATCATG	4	0.000951928	0.0951928
ATCGCC/ATGGCG	4	0.000951928	0.0951928
ATCGGC/ATGCCG	4	0.000951928	0.0951928
ACT/AGT	3	0.000713946	0.0713946
AAACC/GGTTT	3	0.000713946	0.0713946
AATAC/ATTGT	3	0.000713946	0.0713946
AATCC/ATTGG	3	0.000713946	0.0713946
AATCG/ATTCG	3	0.000713946	0.0713946
AGATG/ATCTC	3	0.000713946	0.0713946
AAAGAT/ATCTTT	3	0.000713946	0.0713946
AAAGCC/CTTTGG	3	0.000713946	0.0713946
AAATAG/ATTTCT	3	0.000713946	0.0713946
AAATGC/ATTTGC	3	0.000713946	0.0713946
AAATTG/AATTTC	3	0.000713946	0.0713946
AACATG/ATGTTC	3	0.000713946	0.0713946
AACCCG/CGGGTT	3	0.000713946	0.0713946
AACCTC/AGGTTG	3	0.000713946	0.0713946
AACGAC/CGTTGT	3	0.000713946	0.0713946
AACTCC/AGTTGG	3	0.000713946	0.0713946
AACTCG/AGTTCG	3	0.000713946	0.0713946
AACTGG/AGTTCC	3	0.000713946	0.0713946
AAGATC/ATCTTG	3	0.000713946	0.0713946
AAGCAC/CTTGTG	3	0.000713946	0.0713946
AAGGAC/CCTTGT	3	0.000713946	0.0713946
AAGTCC/ACTTGG	3	0.000713946	0.0713946
AATATG/ATATTC	3	0.000713946	0.0713946
AATCCG/ATTCGG	3	0.000713946	0.0713946
AATCTG/AGATTC	3	0.000713946	0.0713946
AATGAG/ATTCTC	3	0.000713946	0.0713946
ACACCC/GGGTGT	3	0.000713946	0.0713946
ACAGGT/ACCTGT	3	0.000713946	0.0713946
ACCTCG/AGGTCG	3	0.000713946	0.0713946
ACTCTC/AGAGTG	3	0.000713946	0.0713946
AGCCCG/CGGGCT	3	0.000713946	0.0713946
ATATCC/ATATGG	3	0.000713946	0.0713946
AGGC/CCTG	2	0.000475964	0.0475964
ATGC/ATGC	2	0.000475964	0.0475964
AAATT/AATTT	2	0.000475964	0.0475964
AACCC/GGGTT	2	0.000475964	0.0475964
AACTG/AGTTC	2	0.000475964	0.0475964
AAGCC/CTTGG	2	0.000475964	0.0475964
AAGTG/ACTTC	2	0.000475964	0.0475964
AATGT/ACATT	2	0.000475964	0.0475964
ACCCC/GGGGT	2	0.000475964	0.0475964
AGGGG/CCCCT	2	0.000475964	0.0475964
AAAACG/CGTTTT	2	0.000475964	0.0475964
AAACCT/AGGTTT	2	0.000475964	0.0475964
AAAGAC/CTTTGT	2	0.000475964	0.0475964
AAATCG/ATTTCG	2	0.000475964	0.0475964
AACAAT/ATTGTT	2	0.000475964	0.0475964
AACAGG/CCTGTT	2	0.000475964	0.0475964
AACCGG/CCGGTT	2	0.000475964	0.0475964
AACTTG/AAGTTC	2	0.000475964	0.0475964
AAGCTC/AGCTTG	2	0.000475964	0.0475964
AAGGCG/CCTTCG	2	0.000475964	0.0475964
AAGGTC/ACCTTG	2	0.000475964	0.0475964
AAGTAG/ACTTCT	2	0.000475964	0.0475964
AAGTGC/ACTTGC	2	0.000475964	0.0475964
AATCTC/AGATTG	2	0.000475964	0.0475964
AATGGG/ATTCCC	2	0.000475964	0.0475964
AATGTC/ACATTG	2	0.000475964	0.0475964
ACACCG/CGGTGT	2	0.000475964	0.0475964
ACACTC/AGTGTG	2	0.000475964	0.0475964
ACATGC/ATGTGC	2	0.000475964	0.0475964
ACCCAG/CTGGGT	2	0.000475964	0.0475964
ACCCCG/CGGGGT	2	0.000475964	0.0475964
ACCCGC/CGGGTG	2	0.000475964	0.0475964
ACCGAT/ATCGGT	2	0.000475964	0.0475964
ACCTCT/AGAGGT	2	0.000475964	0.0475964
ACCTGC/AGGTGC	2	0.000475964	0.0475964
ACTATC/AGTGAT	2	0.000475964	0.0475964
ACTCAG/AGTCTG	2	0.000475964	0.0475964
ACTCCC/AGTGGG	2	0.000475964	0.0475964
ACTCCG/AGTCGG	2	0.000475964	0.0475964
ACTGAG/AGTCTC	2	0.000475964	0.0475964
ACTGAT/AGTATC	2	0.000475964	0.0475964
ACTGGC/AGTGCC	2	0.000475964	0.0475964
ACTGGG/AGTCCC	2	0.000475964	0.0475964
AGATAT/ATATCT	2	0.000475964	0.0475964
AGATCC/ATCTGG	2	0.000475964	0.0475964
AGATCG/ATCTCG	2	0.000475964	0.0475964
AGCATG/ATGCTC	2	0.000475964	0.0475964
AGCCGC/CGGCTG	2	0.000475964	0.0475964
AGCGAT/ATCGCT	2	0.000475964	0.0475964
AGGATC/ATCCTG	2	0.000475964	0.0475964
AGGCCG/CCTCGG	2	0.000475964	0.0475964
ATATGC/ATATGC	2	0.000475964	0.0475964
AATT/AATT	1	0.000237982	0.0237982
ACCT/AGGT	1	0.000237982	0.0237982
ACTC/AGTG	1	0.000237982	0.0237982
AGCC/CTGG	1	0.000237982	0.0237982
ATCG/ATCG	1	0.000237982	0.0237982
AAACT/AGTTT	1	0.000237982	0.0237982
AAATG/ATTTC	1	0.000237982	0.0237982
AACAG/CTGTT	1	0.000237982	0.0237982
AACAT/ATGTT	1	0.000237982	0.0237982
AACCG/CGGTT	1	0.000237982	0.0237982
AACGG/CCGTT	1	0.000237982	0.0237982
AACTC/AGTTG	1	0.000237982	0.0237982
AAGAT/ATCTT	1	0.000237982	0.0237982
AAGGC/CCTTG	1	0.000237982	0.0237982
AAGGT/ACCTT	1	0.000237982	0.0237982
AATAT/ATATT	1	0.000237982	0.0237982
AATCT/AGATT	1	0.000237982	0.0237982
AATGC/ATTGC	1	0.000237982	0.0237982
ACAGG/CCTGT	1	0.000237982	0.0237982
ACATG/ATGTC	1	0.000237982	0.0237982
ACCCG/CGGGT	1	0.000237982	0.0237982
ACTCT/AGAGT	1	0.000237982	0.0237982
AGCAT/ATGCT	1	0.000237982	0.0237982
AGCCG/CGGCT	1	0.000237982	0.0237982
AGGCC/CCTGG	1	0.000237982	0.0237982
AGGGC/CCCTG	1	0.000237982	0.0237982
ATATC/ATATG	1	0.000237982	0.0237982
ATCCC/ATGGG	1	0.000237982	0.0237982
AAACAT/ATGTTT	1	0.000237982	0.0237982
AAACCG/CGGTTT	1	0.000237982	0.0237982
AAAGGC/CCTTTG	1	0.000237982	0.0237982
AAAGGT/ACCTTT	1	0.000237982	0.0237982
AAATAC/ATTTGT	1	0.000237982	0.0237982
AAATAT/ATATTT	1	0.000237982	0.0237982
AAATTC/AATTTG	1	0.000237982	0.0237982
AACCTG/AGGTTC	1	0.000237982	0.0237982
AACGGG/CCCGTT	1	0.000237982	0.0237982
AACTGC/AGTTGC	1	0.000237982	0.0237982
AACTGT/ACAGTT	1	0.000237982	0.0237982
AAGCCT/AGGCTT	1	0.000237982	0.0237982
AAGGCC/CCTTGG	1	0.000237982	0.0237982
AAGTAC/ACTTGT	1	0.000237982	0.0237982
AAGTCG/ACTTCG	1	0.000237982	0.0237982
AATACC/ATTGGT	1	0.000237982	0.0237982
AATACT/AGTATT	1	0.000237982	0.0237982
AATAGC/ATTGCT	1	0.000237982	0.0237982
AATAGT/ACTATT	1	0.000237982	0.0237982
AATCAT/ATGATT	1	0.000237982	0.0237982
AATCGT/ACGATT	1	0.000237982	0.0237982
AATGCC/ATTGGC	1	0.000237982	0.0237982
AATGTG/ACATTC	1	0.000237982	0.0237982
AATTCG/AATTCG	1	0.000237982	0.0237982
ACACAT/ATGTGT	1	0.000237982	0.0237982
ACACGG/CCGTGT	1	0.000237982	0.0237982
ACAGAT/ATCTGT	1	0.000237982	0.0237982
ACAGCG/CGCTGT	1	0.000237982	0.0237982
ACAGTC/ACTGTG	1	0.000237982	0.0237982
ACAGTG/ACTGTC	1	0.000237982	0.0237982
ACATCC/ATGTGG	1	0.000237982	0.0237982
ACATCT/AGATGT	1	0.000237982	0.0237982
ACATGG/ATGTCC	1	0.000237982	0.0237982
ACATGT/ACATGT	1	0.000237982	0.0237982
ACCAGG/CCTGGT	1	0.000237982	0.0237982
ACCAGT/ACTGGT	1	0.000237982	0.0237982
ACCCAT/ATGGGT	1	0.000237982	0.0237982
ACCCTG/AGGGTC	1	0.000237982	0.0237982
ACCGAG/CGGTCT	1	0.000237982	0.0237982
ACCGGG/CCCGGT	1	0.000237982	0.0237982
ACCGTG/ACGGTC	1	0.000237982	0.0237982
ACGACT/AGTCGT	1	0.000237982	0.0237982
ACGAGC/CGTGCT	1	0.000237982	0.0237982
ACGCCG/CGGCGT	1	0.000237982	0.0237982
ACGGCG/CCGTCG	1	0.000237982	0.0237982
ACGGGC/CCCGTG	1	0.000237982	0.0237982
ACTCGC/AGTGCG	1	0.000237982	0.0237982
AGAGCT/AGCTCT	1	0.000237982	0.0237982
AGCCTG/AGGCTC	1	0.000237982	0.0237982
AGCGCC/CGCTGG	1	0.000237982	0.0237982
AGCGGG/CCCGCT	1	0.000237982	0.0237982
AGGCCC/CCTGGG	1	0.000237982	0.0237982
AGGCCT/AGGCCT	1	0.000237982	0.0237982
AGGGAT/ATCCCT	1	0.000237982	0.0237982
ATCCGC/ATGCGG	1	0.000237982	0.0237982
ATCCGG/ATCCGG	1	0.000237982	0.0237982
ATGCCC/ATGGGC	1	0.000237982	0.0237982
